# Supplementary material for: Highly efficient As(v)/Sb(v) removal by magnetic sludge composite: synthesis, characterization, equilibrium, and mechanism studies
Source: Royal Society of Chemistry journal article supplement (doi:10.1039/c6ra06208c), 2016-01-01
Supplement: c6ra06208c1.pdf [file c6ra06208c1.pdf]

## Supporting Information

# Highly efficient As(V)/Sb(V) removal by magnetic sludge composite: synthesis, characterization, equilibrium, and mechanism studies

Li Wang , Jing-Mei Wang , Ren Zhang , Xin-Gang Liu , Guo-Xin Song , Xiao-Feng Chen , Yi Wang\*,

Ji-Lie Kong

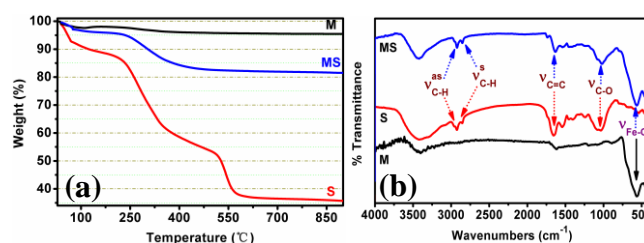

**Fig. S1** (a) TG curves and (b) FTIR spectra of sludge (S), pristine magnetite nanoparticles (M), and magnetic sludge (MS).

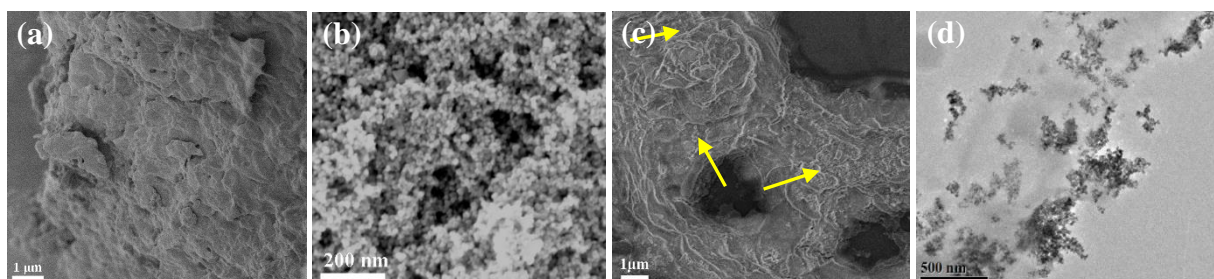

**Fig. S2** (a–c) SEM images of (a) Lyophilized activated sludge (S), (b) Pristine magnetite nanoparticles (M), and (c) Magnetic sludge (MS). (d) TEM images of magnetic sludge (MS).

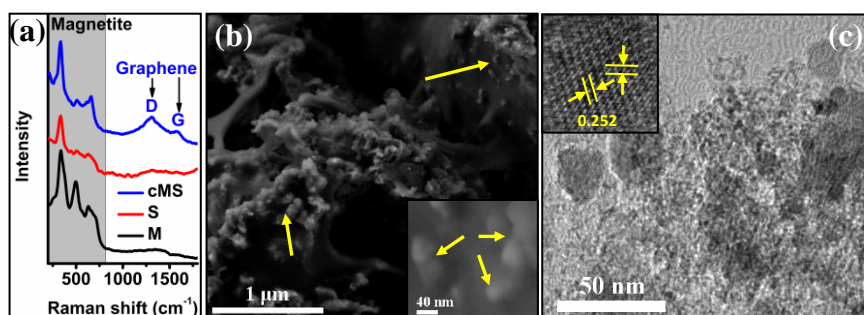

**Fig. S3** (a) Raman spectrum of sludge (S), pristine magnetite NPs (M), and calcined magnetic sludge (cMS). (b)

SEM image of cMS, with the inset and arrows highlighting the Fe<sub>3</sub>O<sub>4</sub> nanoparticles. (c) TEM image of cMS with an inset showing a HRTEM image of the confined nanoparticles.

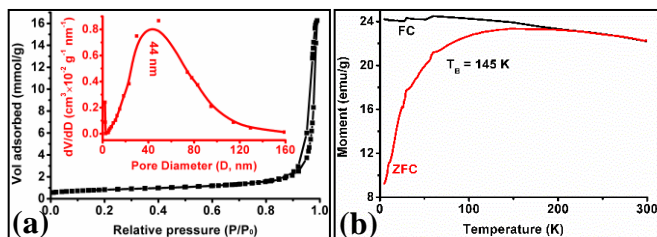

**Fig. S4** (a) N<sub>2</sub> adsorption–desorption isotherm and pore size distribution curve (inset) for the magnetic sludge. (b) Zero-field-cooled and field-cooled magnetization curves of the magnetic sludge under an applied magnetic field intensity (H) of 300 Oe.

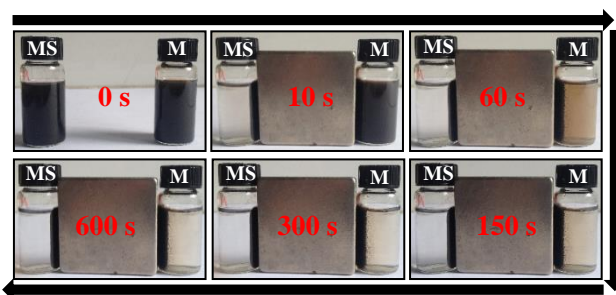

**Fig. S5** Images of pristine magnetite nanoparticles (M) and magnetic sludge (MS) in the presence of a magnet for different time periods.

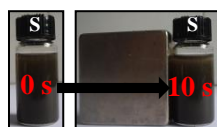

**Fig. S6** Images of sludge in the absence (left) and presence (right) of a magnet.

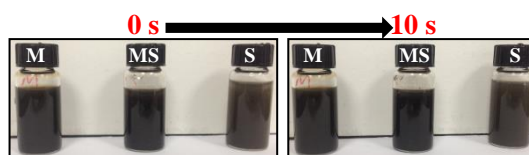

**Fig. S7** Images of sludge (S), pristine magnetite nanoparticles (M), and magnetic sludge (MS) in the absence of a magnet.

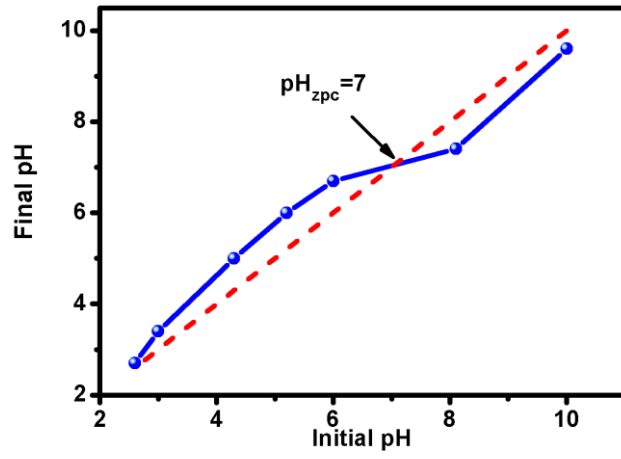

**Fig. S8** Zero point of charge for the magnetic sludge.
